# Supplementary material for: arrayQualityMetrics—a bioconductor package for quality assessment of microarray data
Source: PubMed Central journal article supplement — Bioinformatics. 2008 Dec 23;25(3):415–6. doi: 10.1093/bioinformatics/btn647 (PMC2639074; doi:10.1093/bioinformatics/btn647), 2008-12-23
Supplement: btn647_1.pdf [file btn647_1.pdf]

|                   |                  | affyQCReport | AffyExpress | arrayQuality | beadarray | arrayMvout | yaqcaffy | mdqc | ArrayTool | arrayQualityMetrics |
|-------------------|------------------|--------------|-------------|--------------|-----------|------------|----------|------|-----------|---------------------|
| Platform          | Affymetrix       | Yes          | Yes         | No           | No        | Yes        | Yes      | Yes  | Yes       | Yes                 |
|                   | 2-colours arrays | No           | No          | Yes          | No        | No         | No       | Yes  | No        | Yes                 |
|                   | Illumina         | No           | No          | No           | Yes       | Yes        | No       | Yes  | No        | Yes                 |
|                   | Others           | No           | No          | No           | No        | No         | No       | Yes  | No        | Yes                 |
| Quality Metric    | MA plot          | Yes          | No          | Yes          | No        | No         | NA       | NA   | No        | Yes                 |
|                   | Spatial plot     | No           | Yes         | Yes          | Yes       | No         | NA       | NA   | No        | Yes                 |
|                   | Boxplot          | Yes          | Yes         | No           | Yes       | Yes        | NA       | NA   | Yes       | Yes                 |
|                   | Density          | Yes          | No          | No           | No        | No         | NA       | NA   | No        | Yes                 |
|                   | HC*/Heatmap      | Yes          | Yes         | No           | No        | No         | NA       | NA   | Yes       | Yes                 |
|                   | GC content       | No           | No          | No           | No        | No         | NA       | NA   | No        | Yes                 |
|                   | Probes mapping   | No           | No          | No           | No        | No         | NA       | NA   | No        | Yes                 |
|                   | Mean/SD          | No           | No          | No           | No        | No         | NA       | NA   | No        | Yes                 |
|                   | Affy specific    | Yes          | Yes         | NA           | NA        | Yes        | NA       | NA   | Yes       | Yes                 |
|                   | Others           | No           | No          | Yes          | Yes       | Yes        | NA       | NA   | Yes       | No                  |
| Outlier detection | Probes           | No           | No          | No           | Yes       | No         | No       | No   | No        | No                  |
|                   | Arrays           | No           | No          | No           | No        | Yes        | Yes      | Yes  | No        | Yes                 |
| Preprocessing     | Normalisation    | No           | No          | No           | Yes       | No         | NA       | NA   | Yes       | No                  |
| Specifications    | # code lines**   | 1            | 1           | 1            | 3         | 5          | 2        | > 1  | > 1       | 1                   |
|                   | Summary report   | Yes          | Yes         | Yes          | No        | No         | NA       | NA   | Yes       | Yes                 |

## Survey of Quality Assessment and outlier detection packages from Bioconductor

### Legend:

\* HC: Hierarchical clustering

\*\* number of code lines needed to achieve the most complete QA possible with the concerned package

NA: Not Applicable (when the package does not address the question)
